# Supplementary material for: Using Next-Generation Sequencing to Disentangle the Diet and Incidence of Intestinal Parasites of Falkland Flightless Steamer Duck Tachyeres brachypterus and Patagonian Crested Duck Lophonetta specularioides Sharing a South Atlantic Island
Source: MDPI journal article supplement (doi:10.3390/genes14030731), 2023-03-16
Supplement: s1 [file s1]

# **Using next generation sequencing to disentangle the diet and incidence of intestinal parasites of Falkland Flightless Steamer Duck *Tachyeres brachypterus* and Patagonian Crested Ducks *Lophonetta specularioides* sharing a South Atlantic island**

Juan F. Masello <sup>1,\*</sup>, Yvonne R. Schumm <sup>1</sup>, Sven Griep <sup>2</sup> and Petra Quillfeldt <sup>1</sup>

<sup>1</sup> Department of Animal Ecology & Systematics, Justus Liebig University Giessen, Heinrich-Buff-Ring 26, D-35392 Giessen, Germany;

<sup>2</sup> Institute for Bioinformatics & Systems, Biology Justus Liebig University Giessen, Heinrich-Buff-Ring 58, D-35392 Giessen, Germany;

\* Correspondence: [juan.masello@gmx.de](mailto:juan.masello@gmx.de)

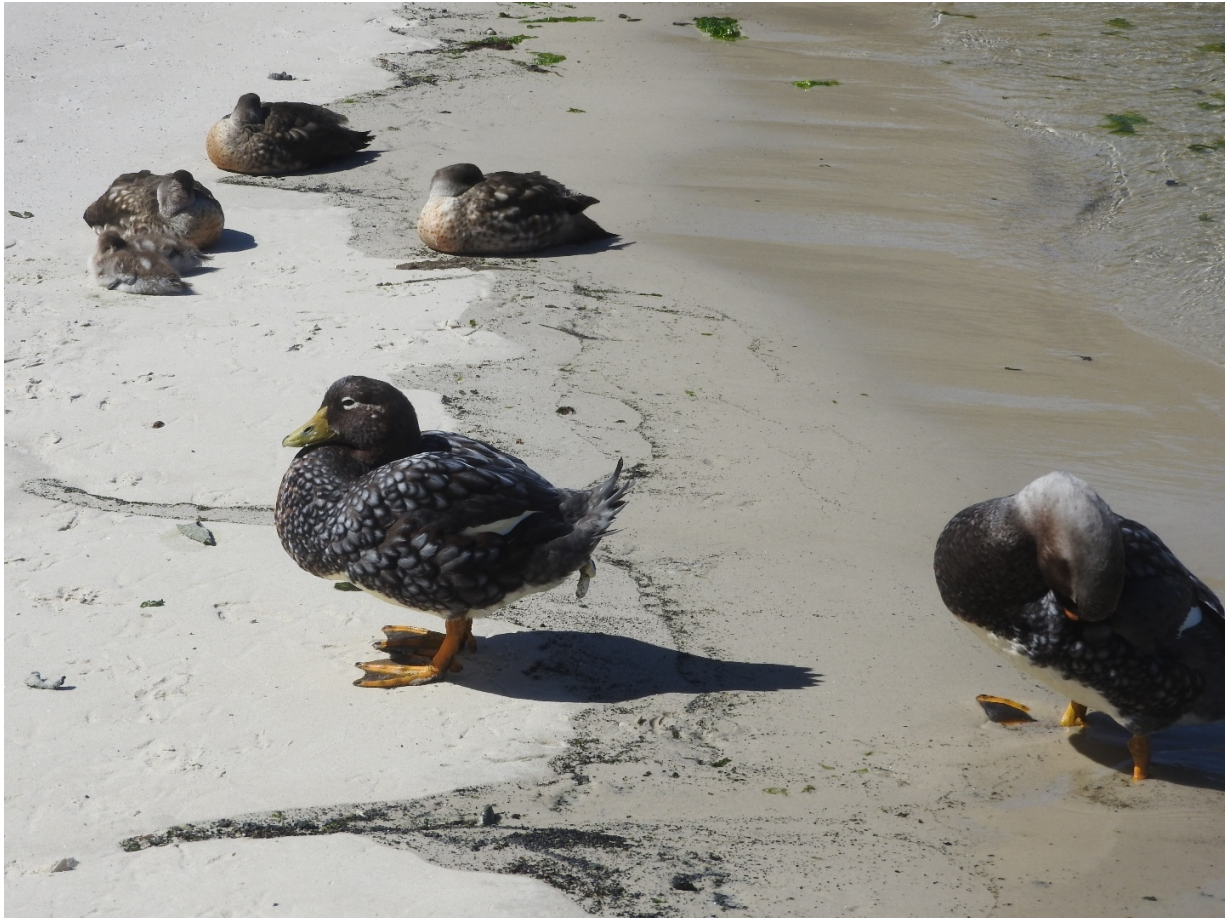

**Figure S1.** Falkland Flightless Steamer Duck *Tachyeres brachypterus* (front) and Patagonian Crested Ducks *Lophonetta specularioides* (back) sharing a beach environment on New Island. Note the female Falkland Flightless Steamer Duck defecating (front left). Photo credit: Petra Quillfeldt

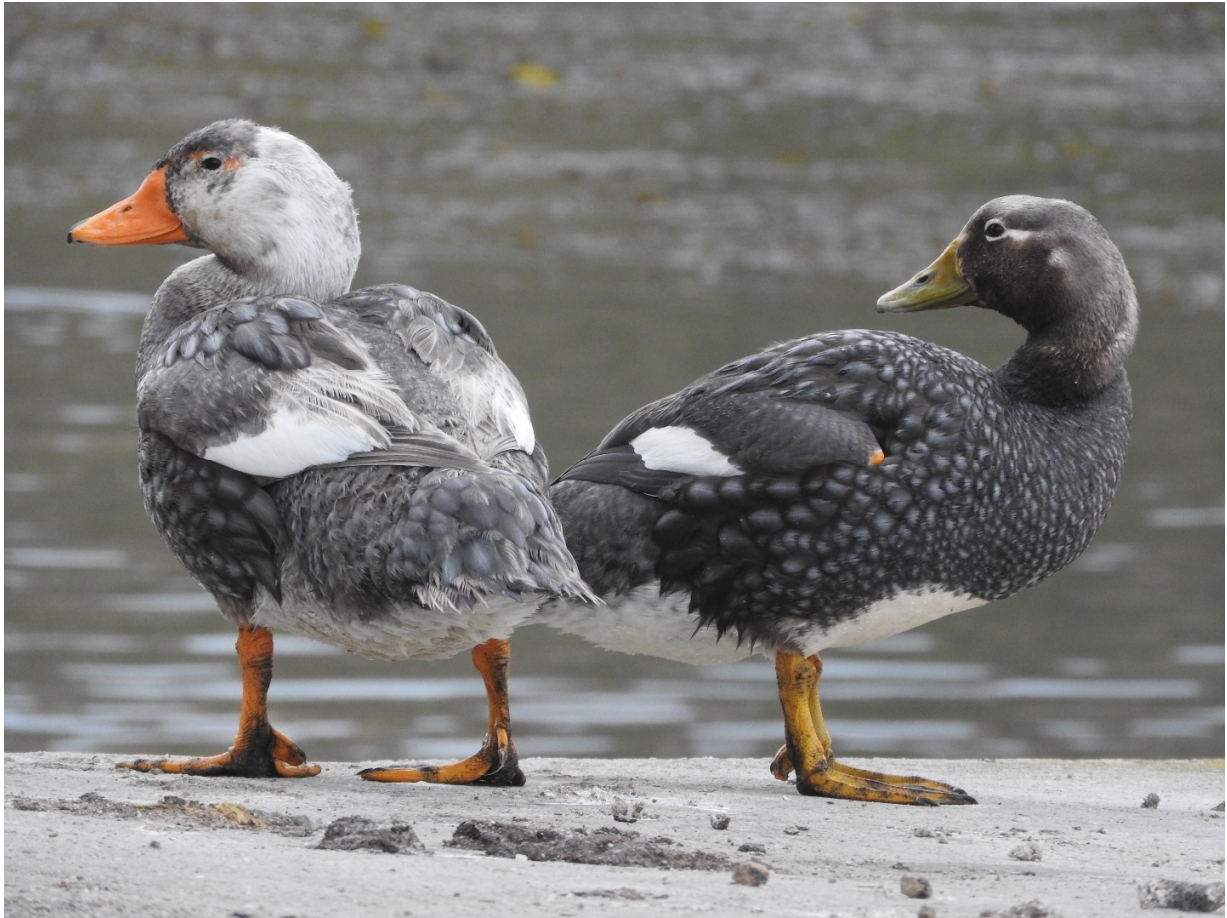

**Figure S2.** Female (right) and male (left) Falkland Flightless Steamer Duck *Tachyeres brachydactyla* from New Island. Photo credit: Petra Quillfeldt



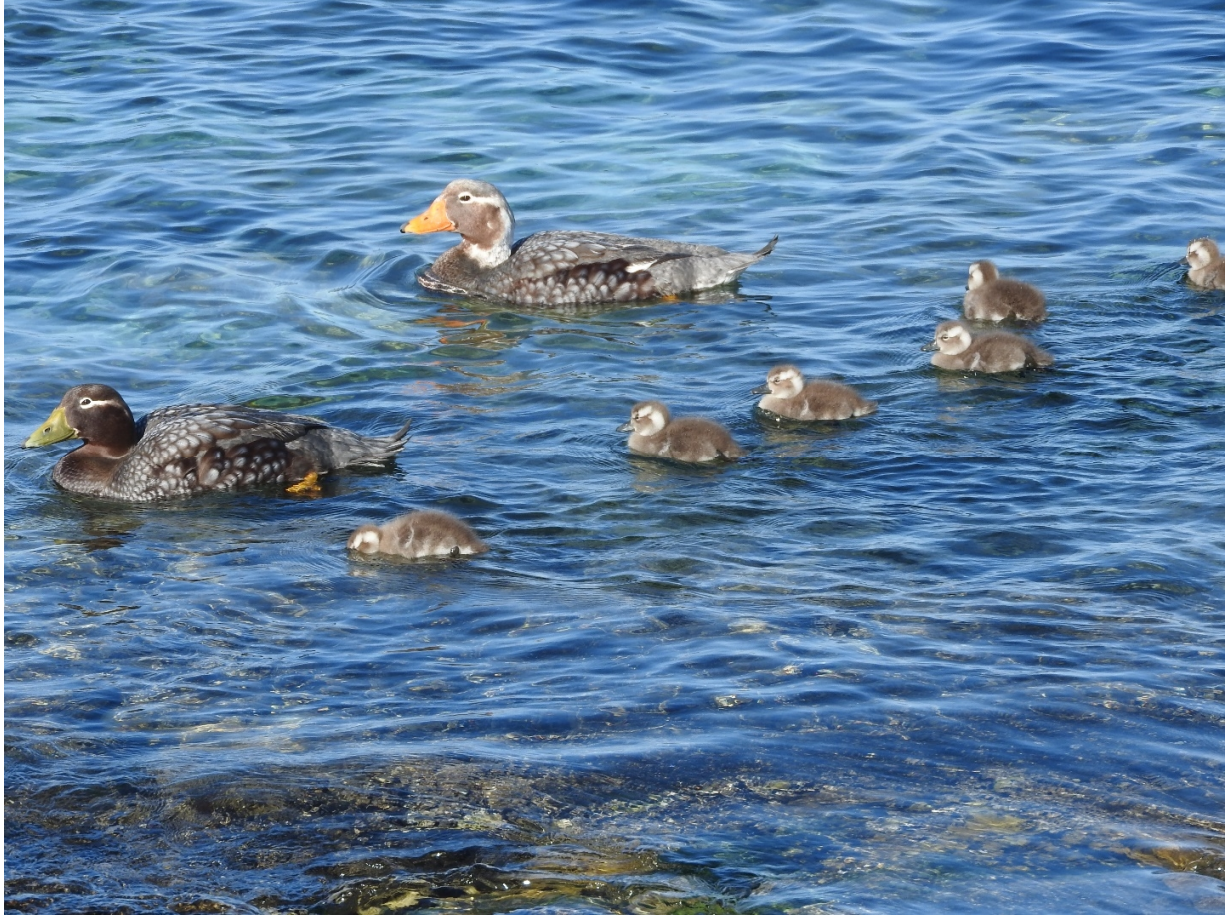

**Figure S3.** Falkland Flightless Steamer Duck *Tachyeres brachydactyla* parents and their chicks foraging in the vicinity of Protector Beach, New Island. Photo credit: Petra Quillfeldt



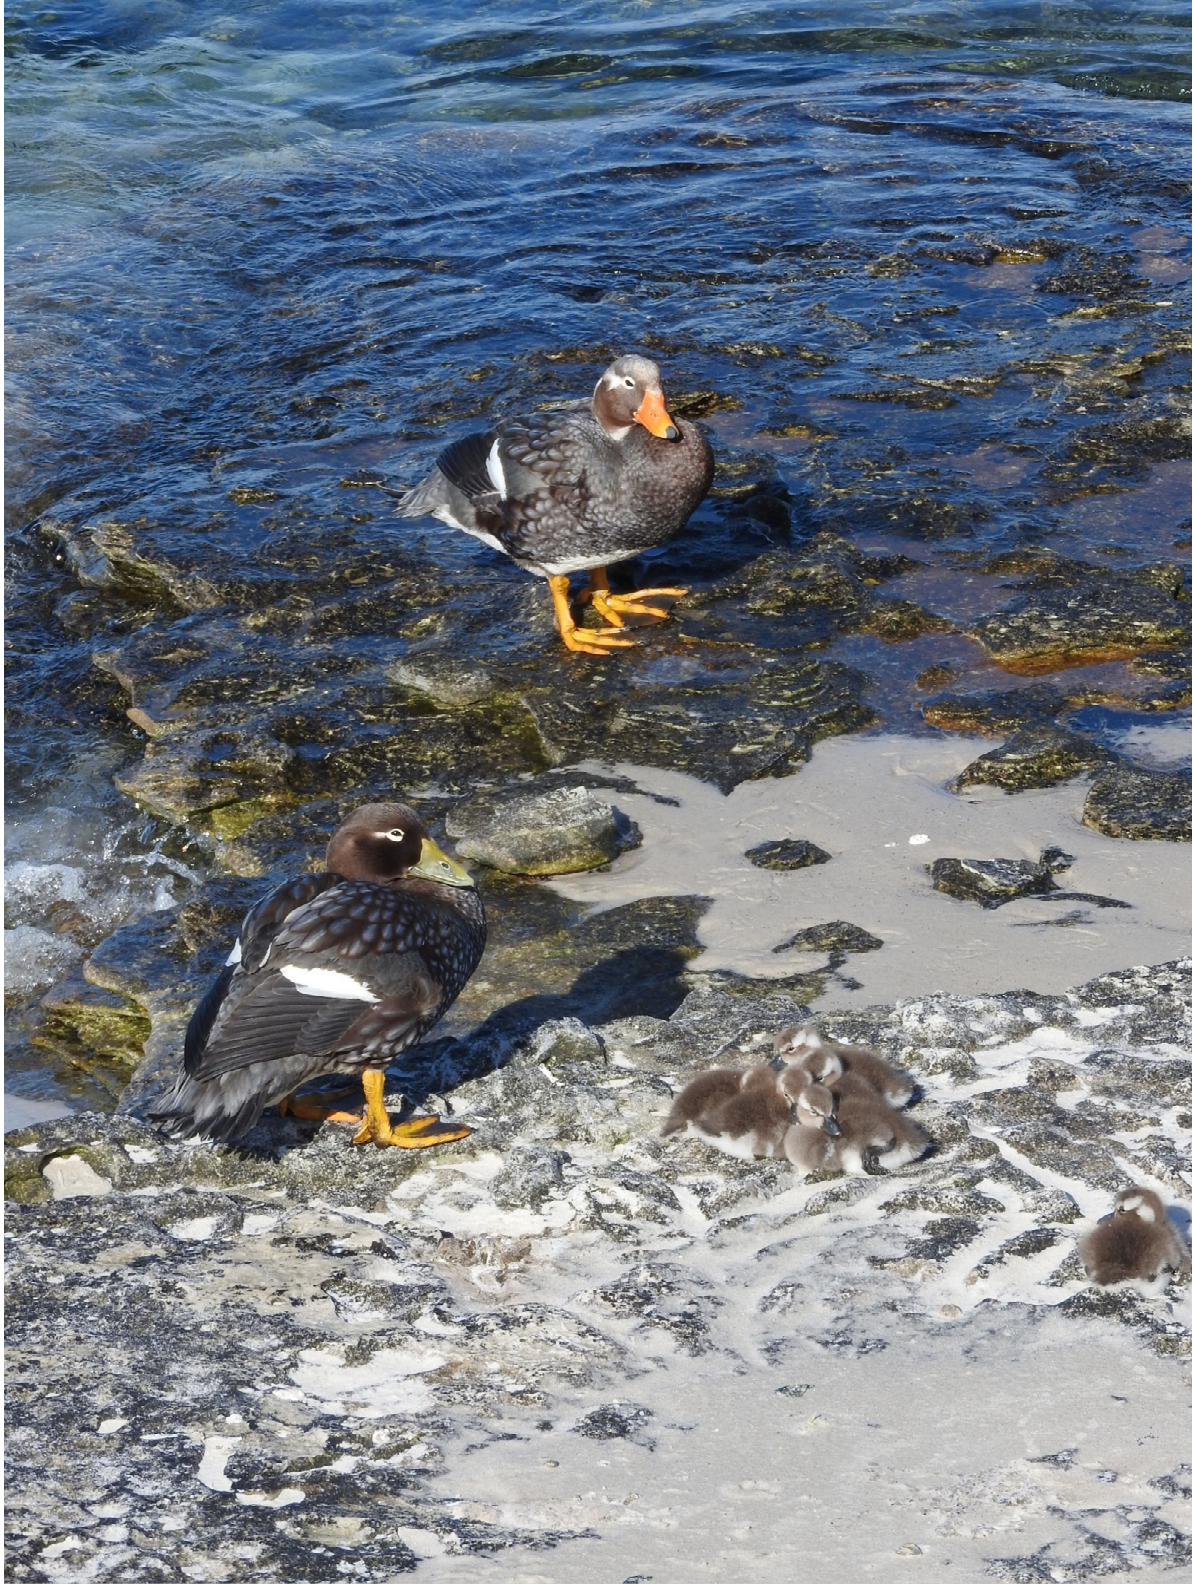

**Figure S4.** Falkland Flightless Steamer Duck *Tachyeres brachydactyla* parents and their chicks resting on South Harbour Beach, New Island, where several of the scats were collected. Photo credit: Petra Quillfeldt



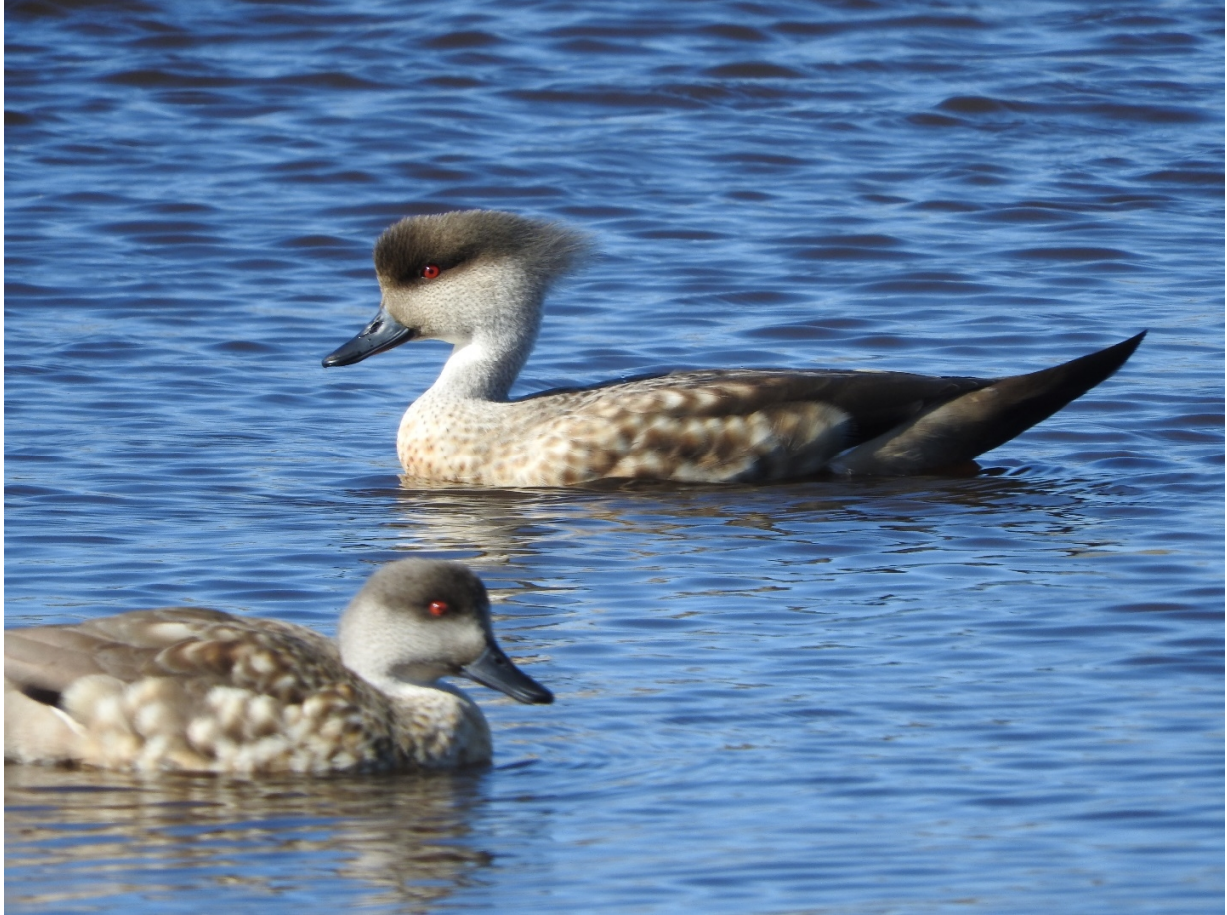

**Figure S5.** Patagonian Crested Duck *Lophonetta specularoides* foraging on New Island. Photo credit: Petra Quillfeldt

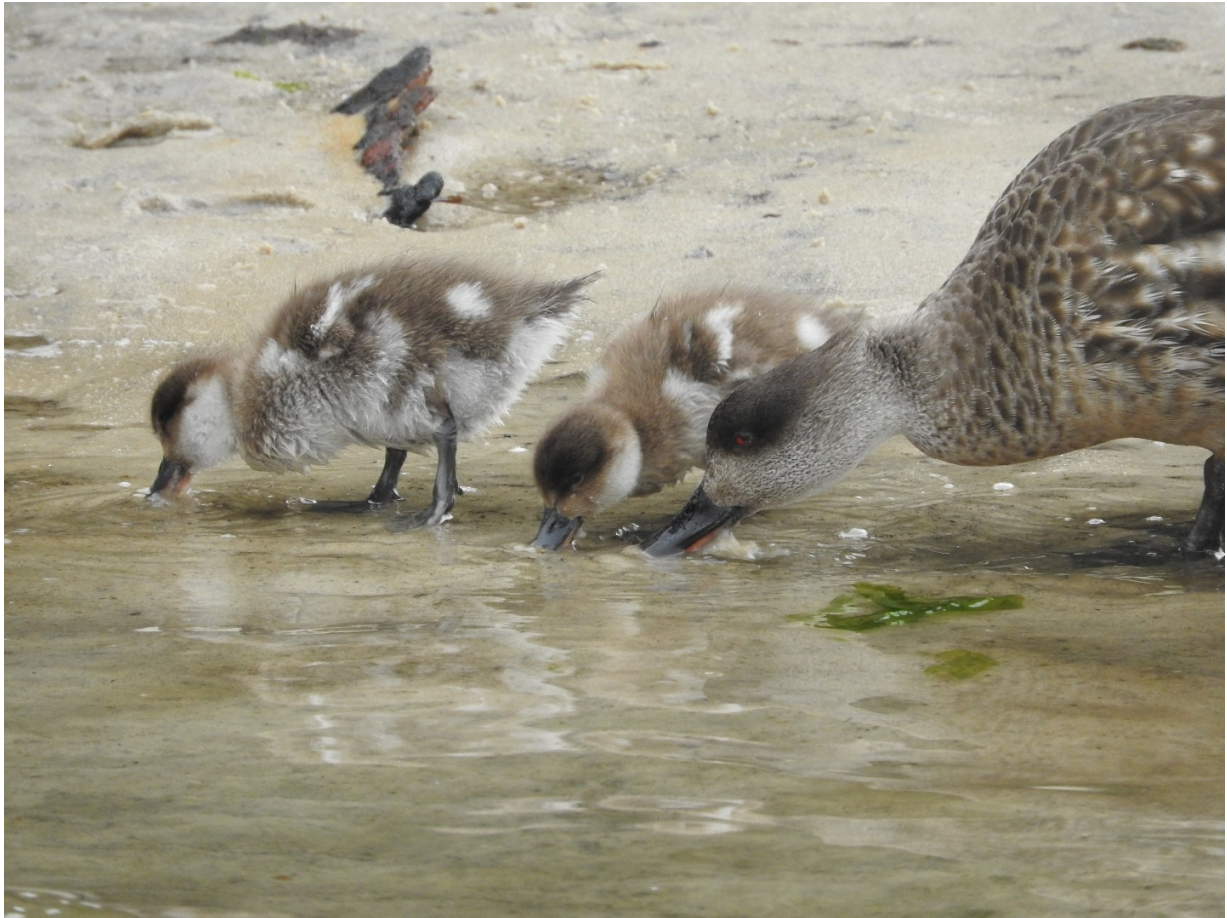

**Figure S6.** Patagonian Crested Duck *Lophonetta specularoides* adult and chicks foraging on Protector Beach, New Island. Photo credit: Petra Quillfeldt



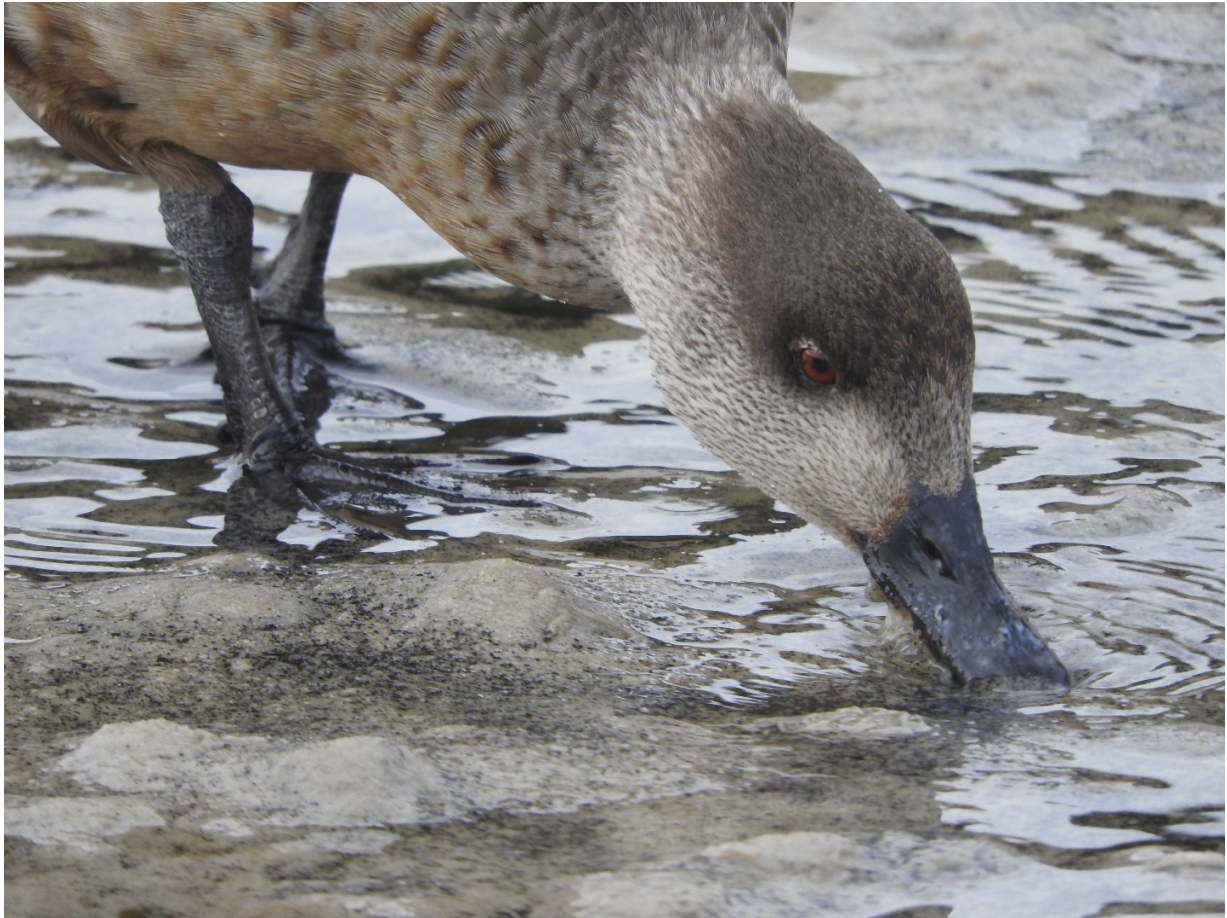

**Figure S7.** Patagonian Crested Duck *Lophonetta specularioides* adult foraging on Protector Beach, New Island.  
Photo credit: Petra Quillfeldt
