# Supplementary figures and images for: Using Next-Generation Sequencing to Disentangle the Diet and Incidence of Intestinal Parasites of Falkland Flightless Steamer Duck Tachyeres brachypterus and Patagonian Crested Duck Lophonetta specularioides Sharing a South Atlantic Island
Source: MDPI journal article supplement (doi:10.3390/genes14030731), 2023-03-16

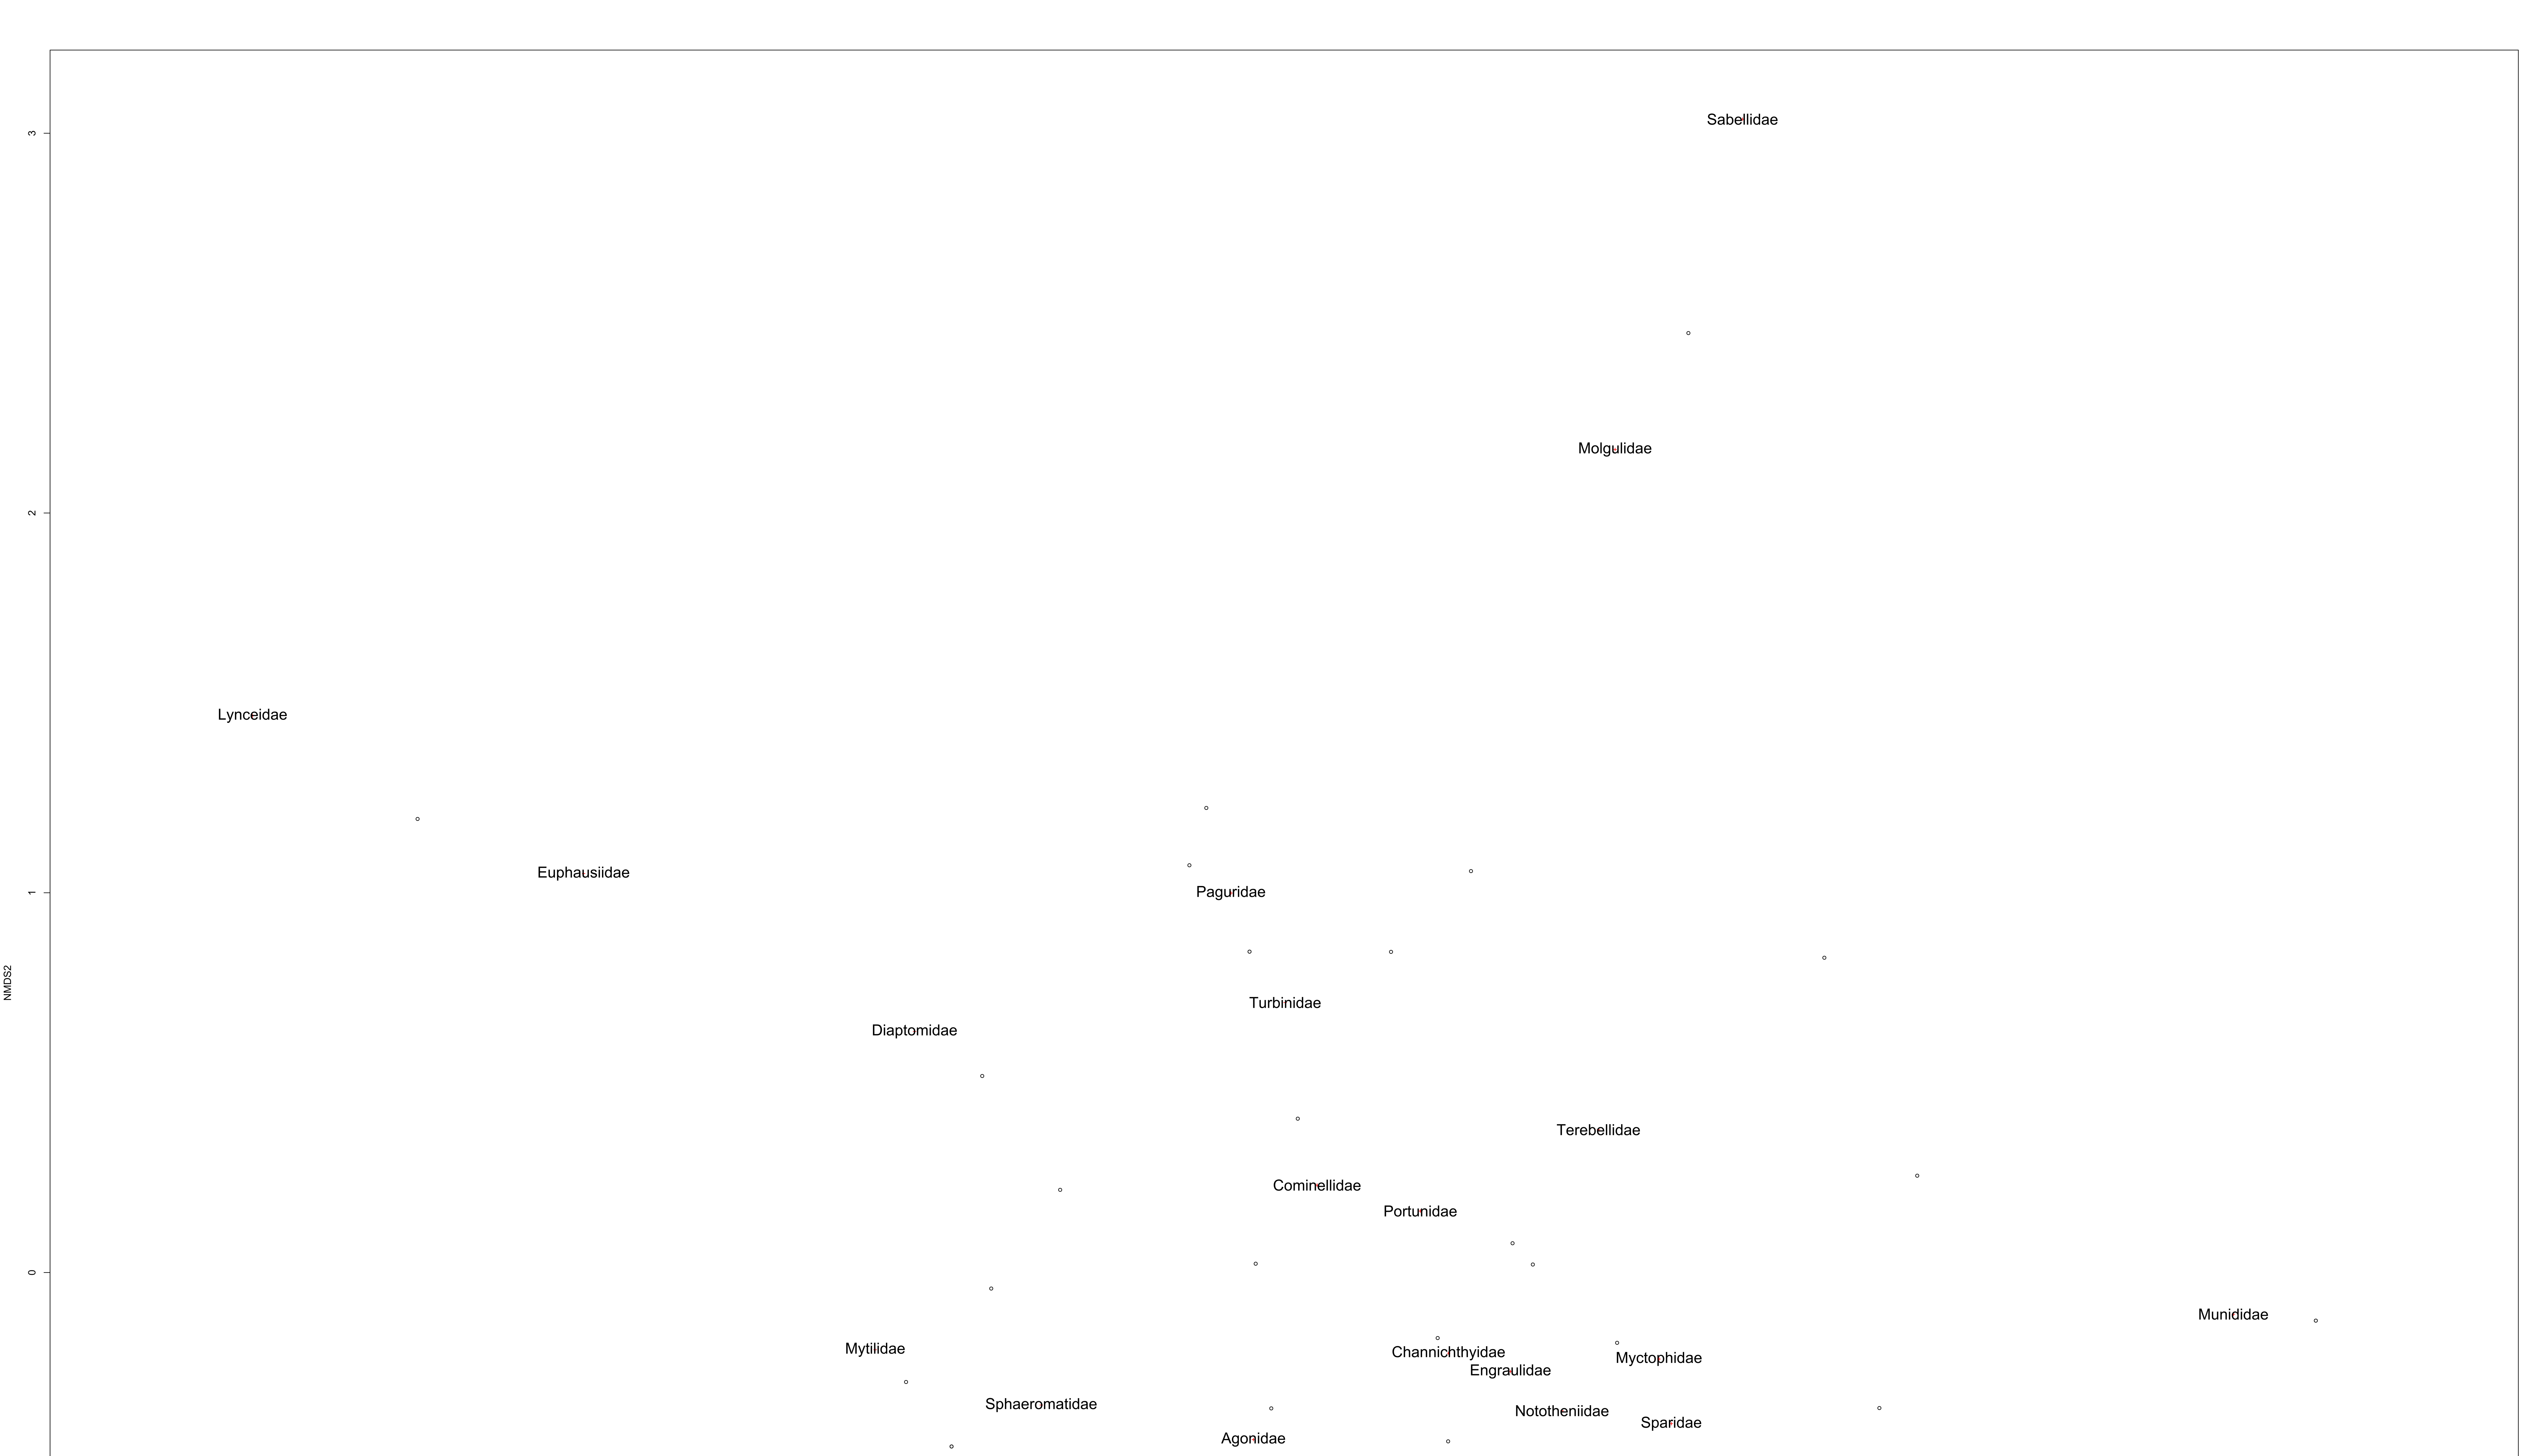

Supplement: s1 [file s1]
